# Supplementary material for: Association between adolescent tobacco, alcohol and illicit drug use and individual and environmental resilience protective factors
Source: PubMed Central journal article supplement — BMJ Open. 2016 Nov 25;6(11):e012688. doi: 10.1136/bmjopen-2016-012688 (PMC5168489; doi:10.1136/bmjopen-2016-012688), 2016-11-25
Supplement: bmjopen-2016-012688supp_appendix.pdf [file bmjopen-2016-012688supp_appendix.pdf]

Appendix A. Correlation between individual and environmental resilience protective factor subscales

|                                         | 1     | 2     | 3     | 4     | 5     | 6    | 7     | 8     | 9     | 10    | 11    | 12    | 13    | 14   |
|-----------------------------------------|-------|-------|-------|-------|-------|------|-------|-------|-------|-------|-------|-------|-------|------|
| Cooperation and communication (1)       | 1.00  |       |       |       |       |      |       |       |       |       |       |       |       |      |
| Empathy (2)                             | 0.48* | 1.00  |       |       |       |      |       |       |       |       |       |       |       |      |
| Goals and aspirations (3)               | 0.30* | 0.39* | 1.00  |       |       |      |       |       |       |       |       |       |       |      |
| Problem solving (4)                     | 0.43* | 0.38* | 0.31* | 1.00  |       |      |       |       |       |       |       |       |       |      |
| Self-awareness (5)                      | 0.45* | 0.25* | 0.30* | 0.44* | 1.00  |      |       |       |       |       |       |       |       |      |
| Self-efficacy (6)                       | 0.48* | 0.32* | 0.37* | 0.42* | 0.53* | 1.00 |       |       |       |       |       |       |       |      |
| School support (7)                      |       |       |       |       |       |      | 1.00  |       |       |       |       |       |       |      |
| School meaningful participation (8)     |       |       |       |       |       |      | 0.58* | 1.00  |       |       |       |       |       |      |
| Community support (9)                   |       |       |       |       |       |      | 0.53* | 0.42* | 1.00  |       |       |       |       |      |
| Community meaningful participation (10) |       |       |       |       |       |      | 0.36* | 0.41* | 0.42* | 1.00  |       |       |       |      |
| Home support (11)                       |       |       |       |       |       |      | 0.50* | 0.38* | 0.52* | 0.38* | 1.00  |       |       |      |
| Home meaningful participation (12)      |       |       |       |       |       |      | 0.48* | 0.53* | 0.50* | 0.41* | 0.61* | 1.00  |       |      |
| Pro-social peers (13)                   |       |       |       |       |       |      | 0.35* | 0.30* | 0.29* | 0.26* | 0.38* | 0.32* | 1.00  |      |
| Peer caring relationships (14)          |       |       |       |       |       |      | 0.33* | 0.26* | 0.40* | 0.26* | 0.36* | 0.34* | 0.30* | 1.00 |

\*  $p < 0.0001$
